# Supplementary material for: Molecular Population Genetics of Inversion Breakpoint Regions in Drosophila pseudoobscura
Source: PubMed Central journal article supplement (PMC3704243; doi:10.1534/g3.113.006122), 2013-07-01
Supplement: supp_g3.113.006122_TableS1.pdf [file supp_g3.113.006122_TableS1.pdf]

**Table S1 Primer Sequences Used for PCR Amplification**

| Primer Name | Primer Sequence                 | Coordinate Interval     | Length (bp) | Cytological Position | Annealing Temp (° C) |
|-------------|---------------------------------|-------------------------|-------------|----------------------|----------------------|
| pSTPP_f     | GAT ACC ACT CGG CAA GCA GAA G   | 2,292,752...2,293,105   | 354         | 64C                  | 55                   |
| pSTPP_r     | CGC CTC AGT TAA TTA GCC CAC AAA |                         |             |                      |                      |
| pHYSC_f     | TGG TGT TGA GTA TCT GCC GTG GTT | 6,432,216...6,432,591   | 376         | 68C                  | 60                   |
| pHYSC_r     | CTG CTG CCG CTG CTC CTA TCA     |                         |             |                      |                      |
| pSTAR_f     | CCT GAT ACC CAC GGA GTC TTC     | 8,900,356...8,900,823   | 468         | 76B                  | 55                   |
| pSTAR_r     | TCG CTA CAG GGA TCA GGT TTT     |                         |             |                      |                      |
| pHYST_f     | CTT ATT CCC GCC TCT TGT GTA GC  | 9,140,888...9,141,693   | 806         | 76B                  | 60                   |
| pHYST_r     | GAC GGC CCT CAG ACG ATA GTT G   |                         |             |                      |                      |
| dSTPP_f     | ATC GGT ACA ACA GCC AGG GAC AAC | 9,832,256...9,832,828   | 573         | 75B                  | 58                   |
| dSTPP_r     | ACT TCG TGG GAT CGC TGG CAT AAT |                         |             |                      |                      |
| dSCTL_f     | ATG GCG ATG GAG TCC TCT GTC TAT | 10,830,478...10,830,881 | 404         | 74B                  | 60                   |
| dSCTL_r     | ACT GGC GCC ATG TCT CTG TCT CG  |                         |             |                      |                      |
| pSCCH_f     | AAC CGG CAT ACA CCC TCA TTC     | 14,259,606...14,259,984 | 377         | 70C                  | 57                   |
| pSCCH_r     | GTT GCG CAT TAT TTA TTC CCT GTA |                         |             |                      |                      |
| dSCCH_f     | TCC GGA GAT CGC AAA ACT GTC G   | 15426293...15426646     | 379         | 77B                  | 55                   |
| dSCCH_r     | TAT GCG CTG CTT CTG ATG CTT GAT |                         |             |                      |                      |
| dHYSC_f     | GAG CCC GGG CCA GGT CCA T       | 17,444,491...17,444,852 | 362         | 79C                  | 58                   |
| dHYSC_r     | TAT CGT GCG TTG TGC GTA ATC AGC |                         |             |                      |                      |

|         |                                 |                         |     |         |    |
|---------|---------------------------------|-------------------------|-----|---------|----|
| dHYST_f | ACA AGA TCC GGG GTA TTA         | 17,705,2323..17,706,128 | 898 | 79D/80A | 51 |
| dHYST_r | CTG TTC CGG GTA GAT GTA TTC GTA |                         |     |         |    |

---

The abbreviated name represents the location (p, proximal or d, distal) of the breakpoint on the chromosome, and the last four letters represent the two arrangements involved in the inversion. The first two letters are the ancestral arrangement and the last two letters are the derived arrangement. For example, the STPP notation is for the breakpoints that converted the ancestral Standard arrangement into the derived Pikes Peak arrangement. Primer names are the abbreviated region names with the addition of “f” and “r” for forward or reverse. The coordinates are the location of the genetic marker in the genome strain (RICHARDS *et al.* 2005), which carries the Arrowhead arrangement.
