# Supplementary material for: Molecular Population Genetics of Inversion Breakpoint Regions in Drosophila pseudoobscura
Source: PubMed Central journal article supplement (PMC3704243; doi:10.1534/g3.113.006122), 2013-07-01
Supplement: supp_g3.113.006122_TableS6.pdf [file supp_g3.113.006122_TableS6.pdf]

**Table S6 HKA test for the Chiracahua gene arrangement**

| <b>Gene</b> | <b>CH_Obs_S</b> | <b>CH_Exp_S</b> | <b>Dmir_Obs_D</b> | <b>CH_Exp_D</b> |
|-------------|-----------------|-----------------|-------------------|-----------------|
| pSTPP       | 11              | 9.81            | 5.28              | 6.47            |
| en          | 15              | 11.45           | 3.28              | 6.83            |
| pHYSC       | 12              | 12.52           | 8.68              | 8.16            |
| exu1        | 5               | 3.73            | 0.96              | 2.23            |
| pSTAR       | 41              | 38.07           | 22.87             | 25.8            |
| pHYST       | 23              | 26.79           | 21.03             | 17.25           |
| dSTPP       | 22              | 19.14           | 9.77              | 12.63           |
| dSCTL       | 22              | 21.66           | 13.77             | 14.11           |
| eve         | 17              | 13.47           | 4.58              | 8.11            |
| Mef2        | 17              | 17.93           | 12.12             | 11.19           |
| Amy1        | 11              | 12.31           | 8.66              | 7.35            |
| pSCCH       | 8               | 12.86           | 13.71             | 8.85            |
| dSTAR       | 43              | 38.88           | 19.28             | 23.4            |
| dSCCH       | 2               | 3.46            | 3.77              | 2.31            |
| F6          | 22              | 21.11           | 12.70             | 13.59           |
| dHYSC       | 12              | 13.82           | 11.48             | 9.66            |
| dHYST       | 36              | 42.73           | 34.56             | 27.83           |
| EcR         | 8               | 7.25            | 3.57              | 4.33            |
| T           | 1.4             |                 |                   |                 |
| X2          | 8.28            |                 |                   |                 |
| P           | 0.783           |                 |                   |                 |
| sim         | 9875            |                 |                   |                 |
