# Supplementary material for: Molecular Population Genetics of Inversion Breakpoint Regions in Drosophila pseudoobscura
Source: PubMed Central journal article supplement (PMC3704243; doi:10.1534/g3.113.006122), 2013-07-01
Supplement: supp_g3.113.006122_TableS8.pdf [file supp_g3.113.006122_TableS8.pdf]

**Table S8** Observed and expected numbers of polymorphic sites classified into the six unique, shared, and fixed categories for the five gene arrangements of *D. pseudoobscura*.

| Category | Breakpoint  | Non-Breakpoint |
|----------|-------------|----------------|
| 0        | 24 ( 16.8)  | 1 ( 8.2)       |
| 1        | 298 (312.9) | 168 (153.1)    |
| 2        | 80 ( 81.9)  | 42 ( 40.1)     |
| 3        | 44 ( 48.3)  | 28 ( 23.7)     |
| 4        | 56 ( 43.0)  | 8 ( 21.0)      |
| 5        | 7 ( 6.0)    | 2 ( 3.0)       |

Observed (Expected); The blue shaded box indicates a significant deficiency of observed values based on the residuals.
